# Supplementary material
Source: PubMed Central journal article supplement (PMC4891183)
Supplement: NIHMS736982-supplement.pdf [file NIHMS736982-supplement.pdf]

## Supporting Information

### **Efficient pDNA Delivery Using Cationic 2-Hydroxypropyl- $\beta$ -Cyclodextrin:Pluronic-based Polyrotaxanes**

Vivek Badwaik, Yawo Mondjinou, Aditya Kulkarni, Linjia Liu, Asher Demoret and David H. Thompson\*

Department of Chemistry, Multi-disciplinary Cancer Research Facility, Bindley Bioscience Center, 1203 W. State Street, West Lafayette, IN, 47907, USA  
E-mail: davethom@purdue.edu

| <b>Table of Contents</b>                                                                                               | <b>Page</b> |
|------------------------------------------------------------------------------------------------------------------------|-------------|
| 1. Synthesis of Bis-Cholesterol-End-Capped HPCD:Pluronic Polyrotaxanes                                                 | 1           |
| 2. $^1\text{H}$ NMR Spectrum of HPCD:F127, :F68, :L35, :L64 and :L81 Pluronic PR $^+$                                  | 3-7         |
| 3. $^1\text{H}$ NMR Spectrum of DMEDA-HPCD: F127, :F68, :L35, :L64 and :L81 Pluronic PR $^+$                           | 8-12        |
| 4. AFM images                                                                                                          | 13          |
| 5. Gel retardation assay                                                                                               | 14-15       |
| 6. Picogreen Assay                                                                                                     | 15          |
| 7. Raw flow-cytometry data for cellular uptake, transfection and cell viability using SYTOX AADvanced dead stain (red) | 16-21       |

### *1. Synthesis of Bis-Cholesterol-End-Capped HPCD:Pluronic Polyrotaxanes*

Typically, dried  $\alpha$ ,  $\omega$ -bis-tris (2-aminoethyl) amine Pluronic triblock copolymer (0.08 mmol) and 2-hydroxypropyl- $\beta$ -cyclodextrin (using the ratio of CD:PPG unit = 1:2 for each type of Pluronic) were dissolved (or suspended) in 60 mL hexane and the mixtures were vortexed before vigorously stirring for 2 h. Then, bath sonication for 1 h at 20 °C, followed by 10 min probe sonication (Model W-350, 50 W, 1/2" probe) was performed to improve the threading efficiency of the Pluronic copolymer. The mixtures were then stirred for 72 h at 20 °C before removing the solvent under reduced pressure. The mixtures were redissolved in 20 mL of dried  $\text{CH}_2\text{Cl}_2$  and cholesteryl chloroformate (12 equiv) was added. The reaction mixtures were stirred at 20 °C for 24 h and concentrated before precipitation in diethyl ether (700 mL). To remove unreacted reagents and unthreaded cyclodextrins, the crude products were dissolved in  $\text{CH}_3\text{OH}$  (20 mL), precipitated in 500 mL diethyl ether, and filtered. Finally, the products were purified by sequential dialysis using 12,000-14,000 and 6,000-8,000 MWCO regenerated cellulose membranes in DMSO first and progressively exchanged with deionized water for 5 days before lyophilization to generate white HPCD:Pluronic  $\text{PR}^+$  powders.  $^1\text{H}$  NMR (400 MHz,  $\text{DMSO-d}_6$ ):  $\delta$  = 6.92 ppm (s, H-NCO carbamate), 5.25 ppm (t, 1H, Chl-ethylene H), 5.0 ppm (b,  $\text{C}_1$ -H of CD), 4.5 ppm (b, OH propyl), 3.5-3.8 ppm (m,  $\text{C}_{3,5,6}$ -H of CD), 3.5 ppm (m, PEG- $\text{CH}_2$ ), 2.6-2.8 ppm (m, 16H,  $\text{CH}_2$  of TAEA), 1.0 ppm (d,  $\text{CH}_3$  of PPG), 0.8-0.6 ppm (m, Chl- $\text{CH}_3$ ).

# **$^1\text{H}$ NMR Spectrum of HPCD:F127 Pluronic PR**

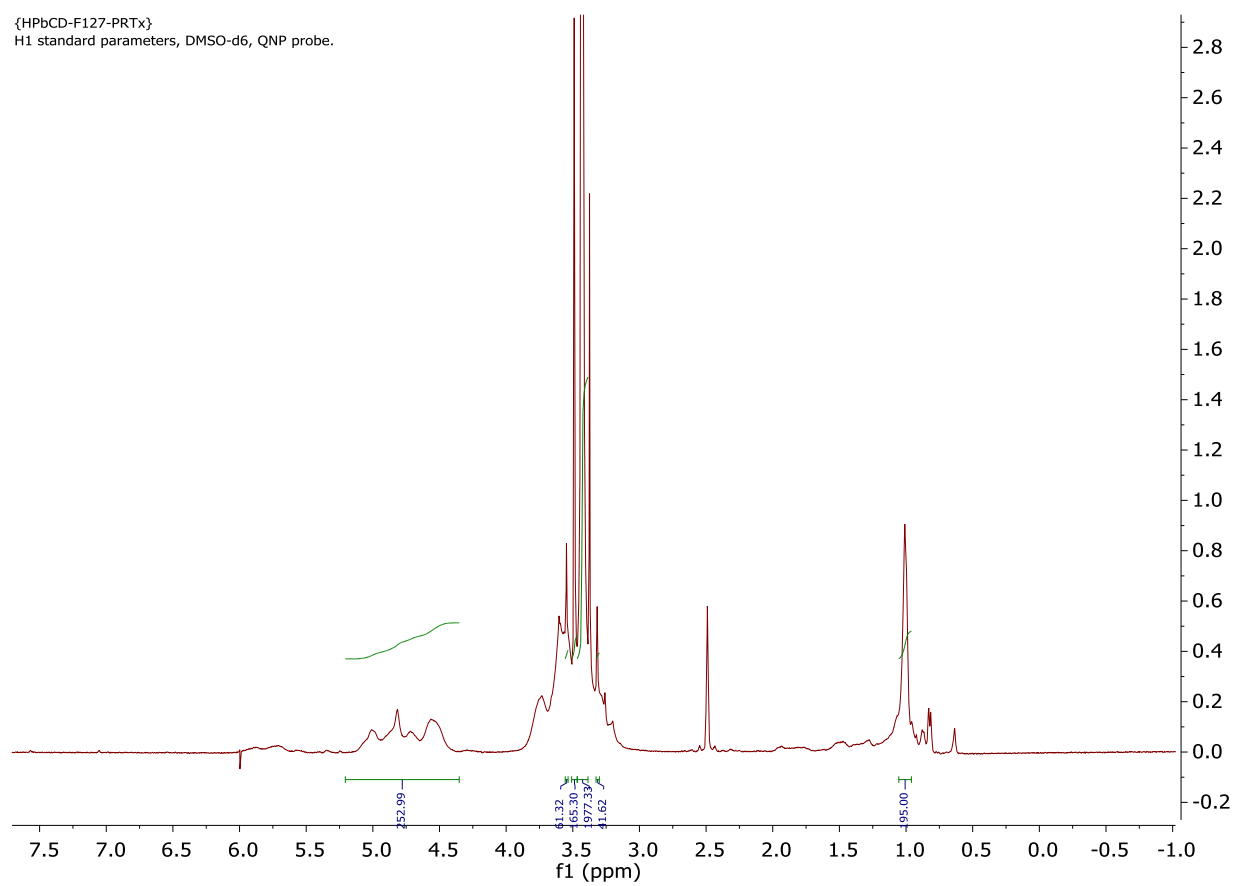

**Figure S1:**  $^1\text{H}$  NMR Spectrum of HPCD:F127 Pluronic PR

## $^1\text{H}$ NMR Spectrum of HPCD:F68 Pluronic PR

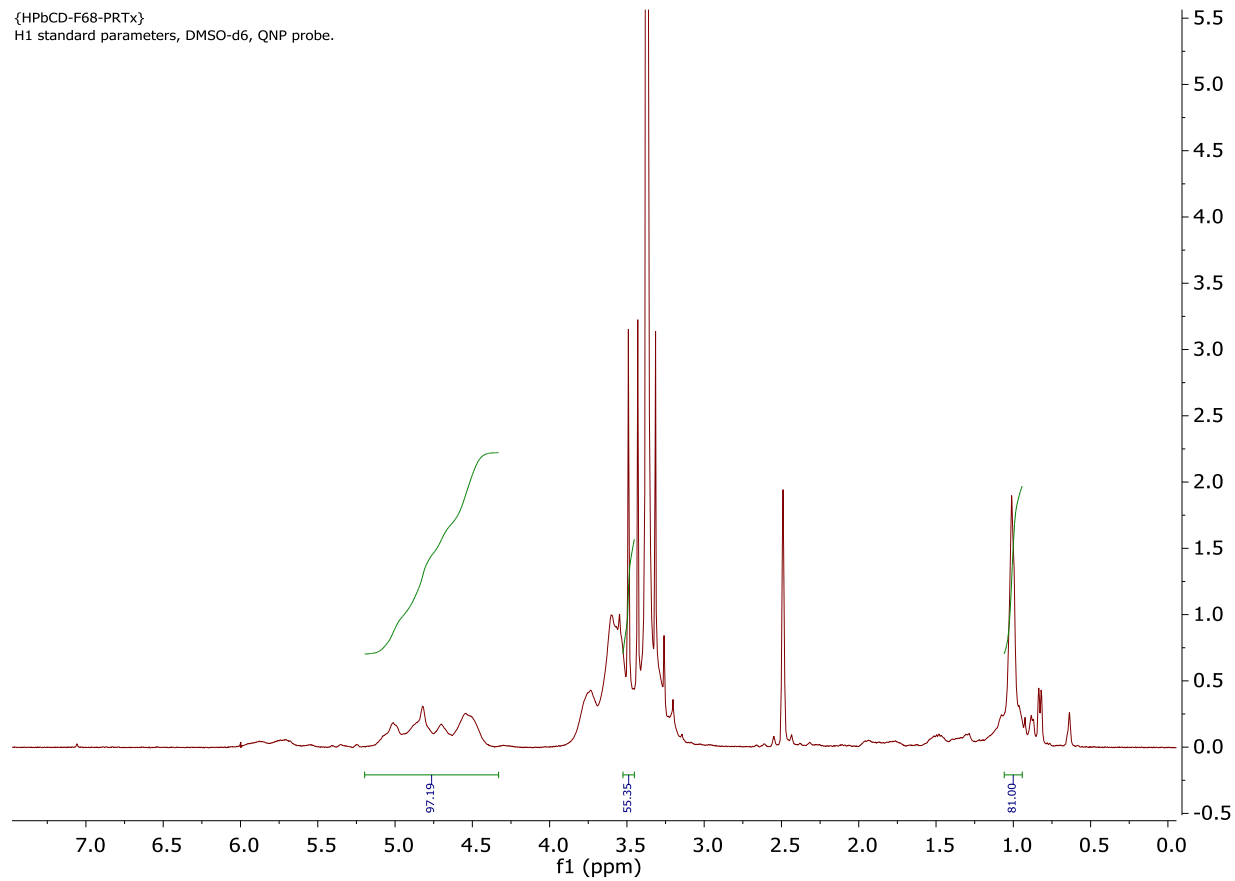

**Figure S2:**  $^1\text{H}$  NMR Spectrum of HPCD:F68 Pluronic PR

## $^1\text{H}$ NMR Spectrum of HPCD:L35 Pluronic PR

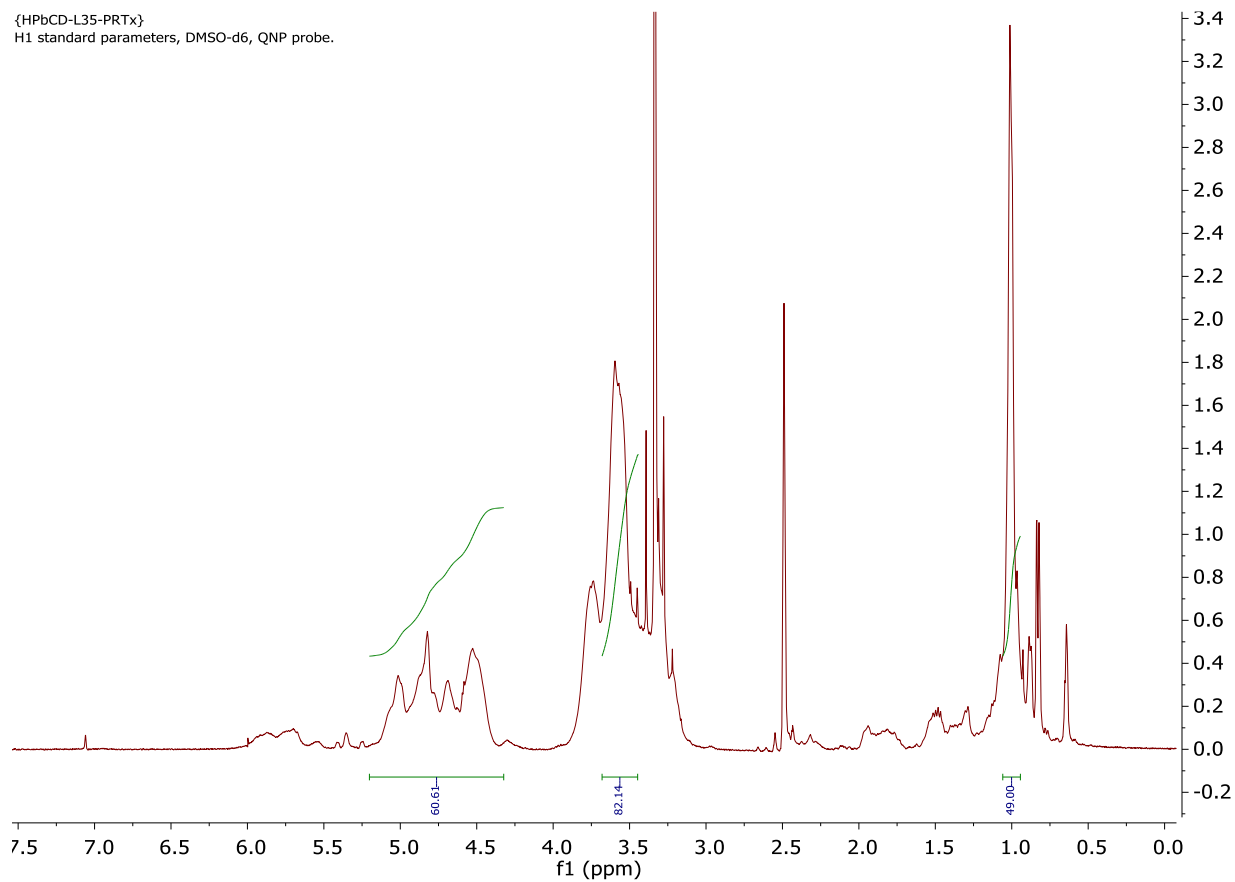

**Figure S3:**  $^1\text{H}$  NMR Spectrum of HPCD:L35 Pluronic PR

## $^1\text{H}$ NMR Spectrum of HPCD:L64 Pluronic PR

{HPbCD-L64-PRTx}  
H1 standard parameters, DMSO-d<sub>6</sub>, QNP probe.

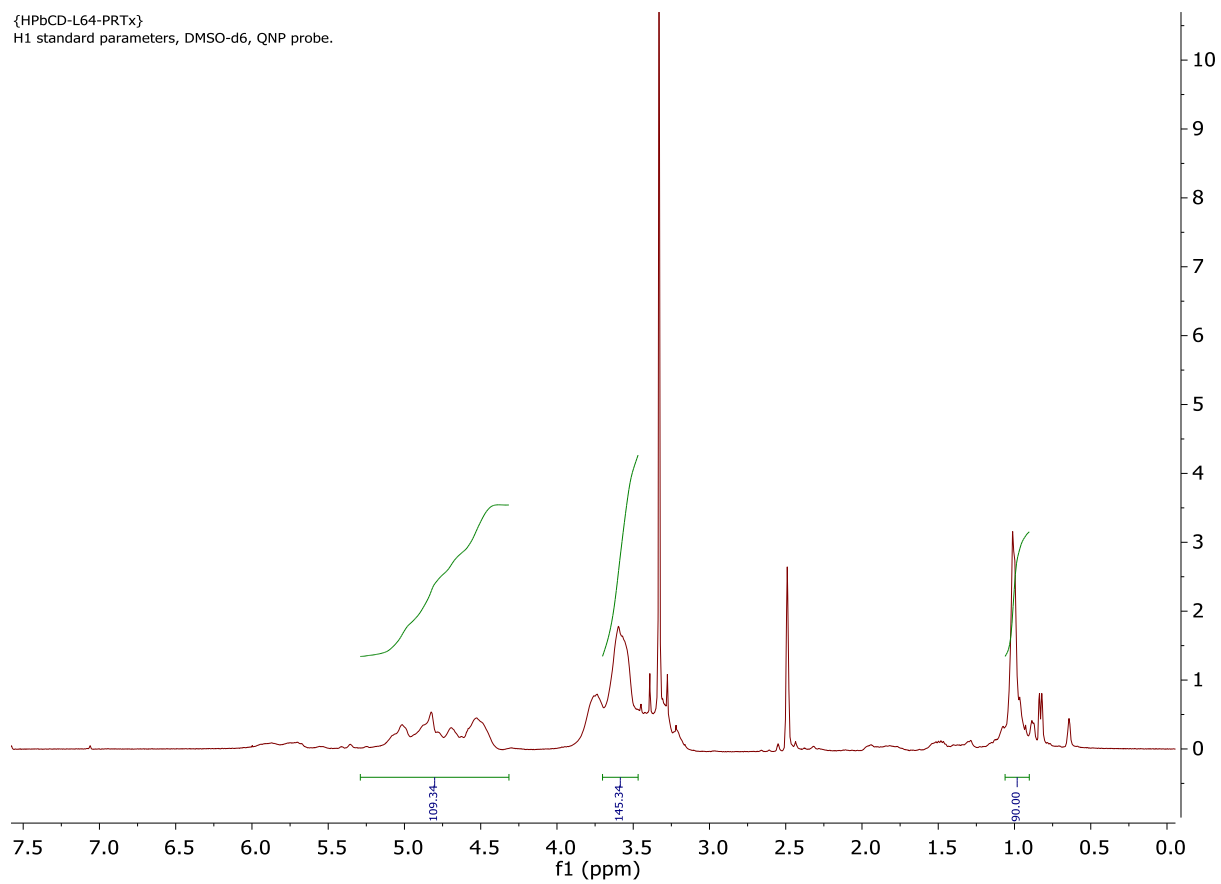

**Figure S4:**  $^1\text{H}$  NMR Spectrum of HPCD:L64 Pluronic PR

## $^1\text{H}$ NMR Spectrum of HPCD:L81 Pluronic PR

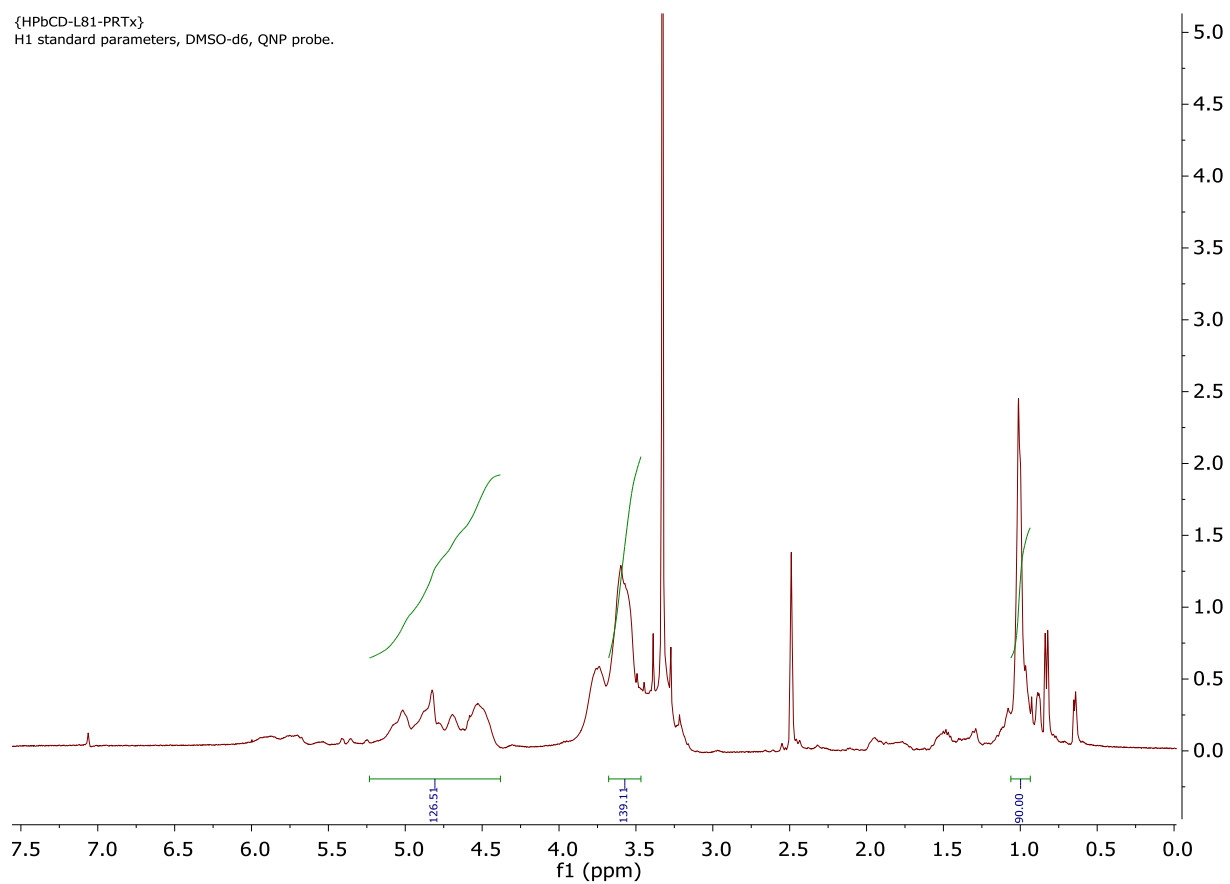

**Figure S5:**  $^1\text{H}$  NMR Spectrum of HPCD:L81 Pluronic PR

## <sup>1</sup>H NMR Spectrum of DMEDA HPCD:F127 Pluronic PR

{DMEDA-HPbCD-F127-PRTx}

H1 standard parameters, DMSO-d6, QNP probe.

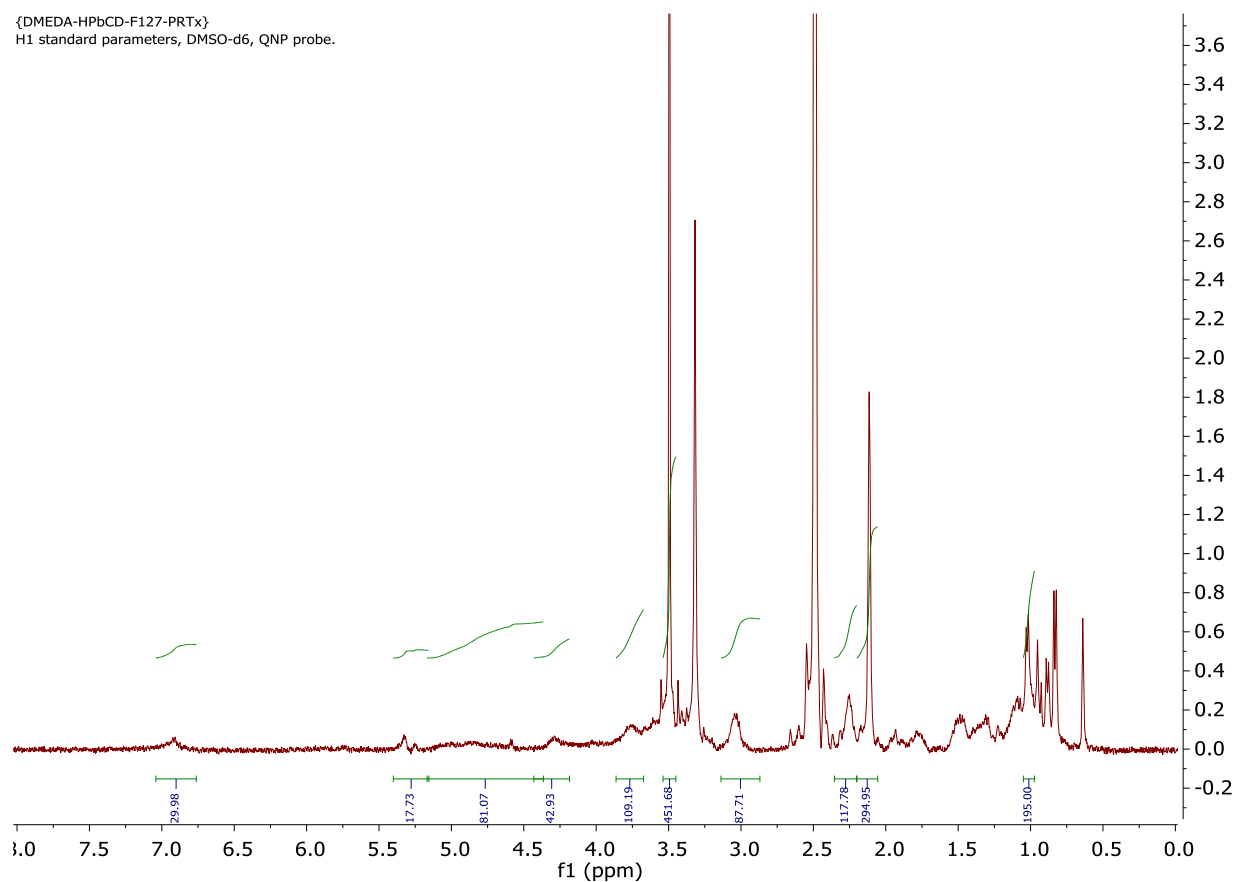

**Figure S6:** <sup>1</sup>H NMR Spectrum of DMEDA-HPbCD:F127 Pluronic PR

## $^1\text{H}$ NMR Spectrum of DMEDA-HPCD:F68 Pluronic PR

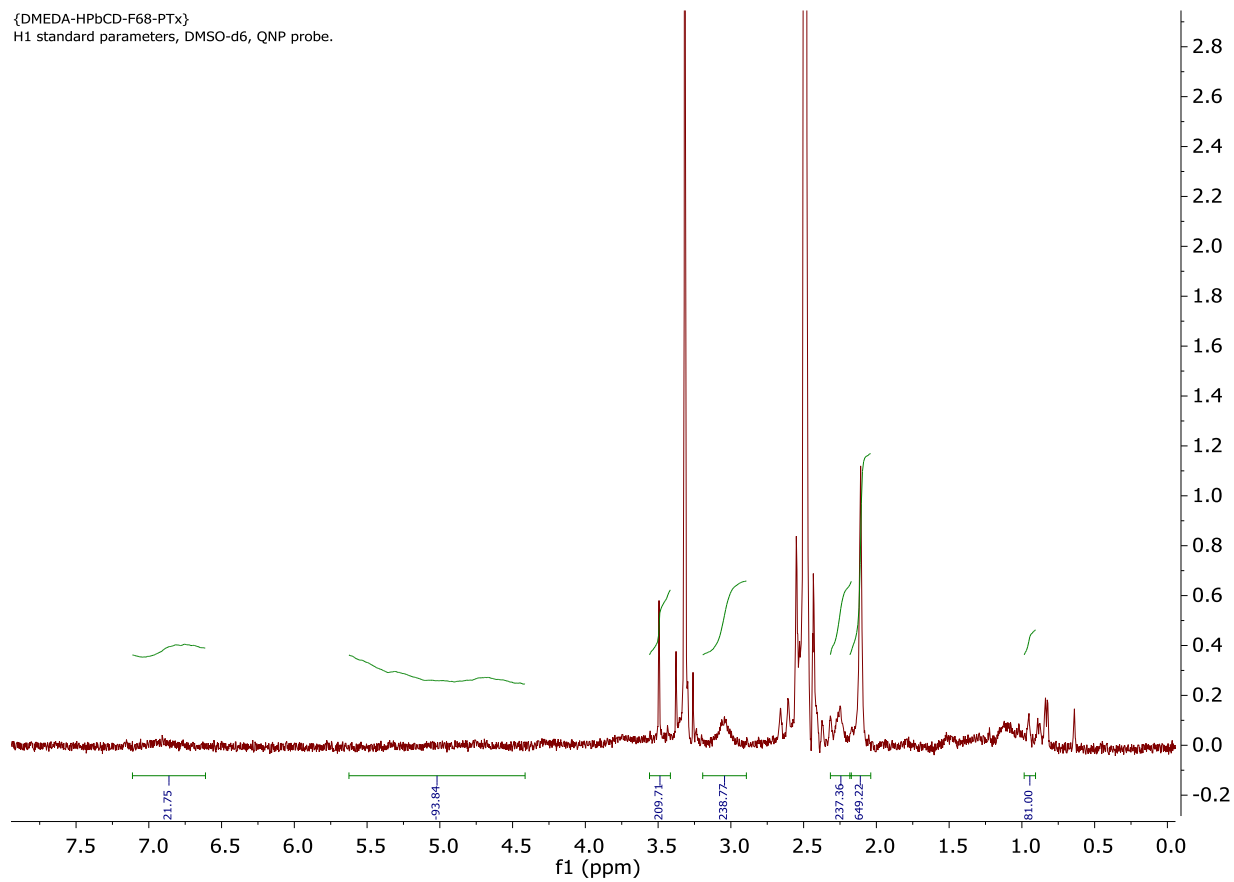

**Figure S7:**  $^1\text{H}$  NMR Spectrum of DMEDA-HPCD:F68 Pluronic PR

# <sup>1</sup>H NMR Spectrum of DMEDA-HPCD:L35 Pluronic PR

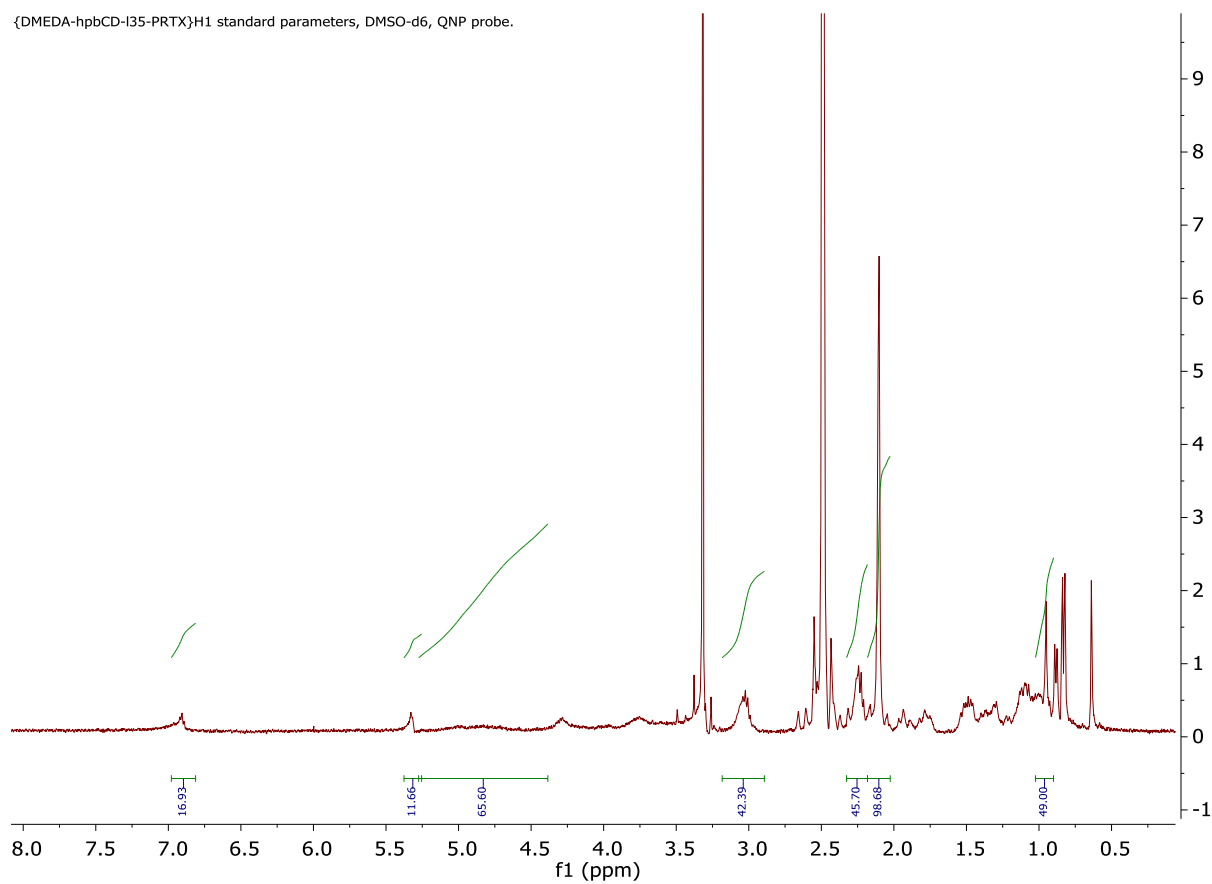

**Figure S8:** <sup>1</sup>H NMR Spectrum of DMEDA-HPCD:L35 Pluronic PR

# **$^1\text{H}$ NMR Spectrum of DMEDA-HPCD:L64 Pluronic PR**

{DMEDA-HPbCD-L64-PRTX}

H1 standard parameters, DMSO-d<sub>6</sub>, QNP probe.

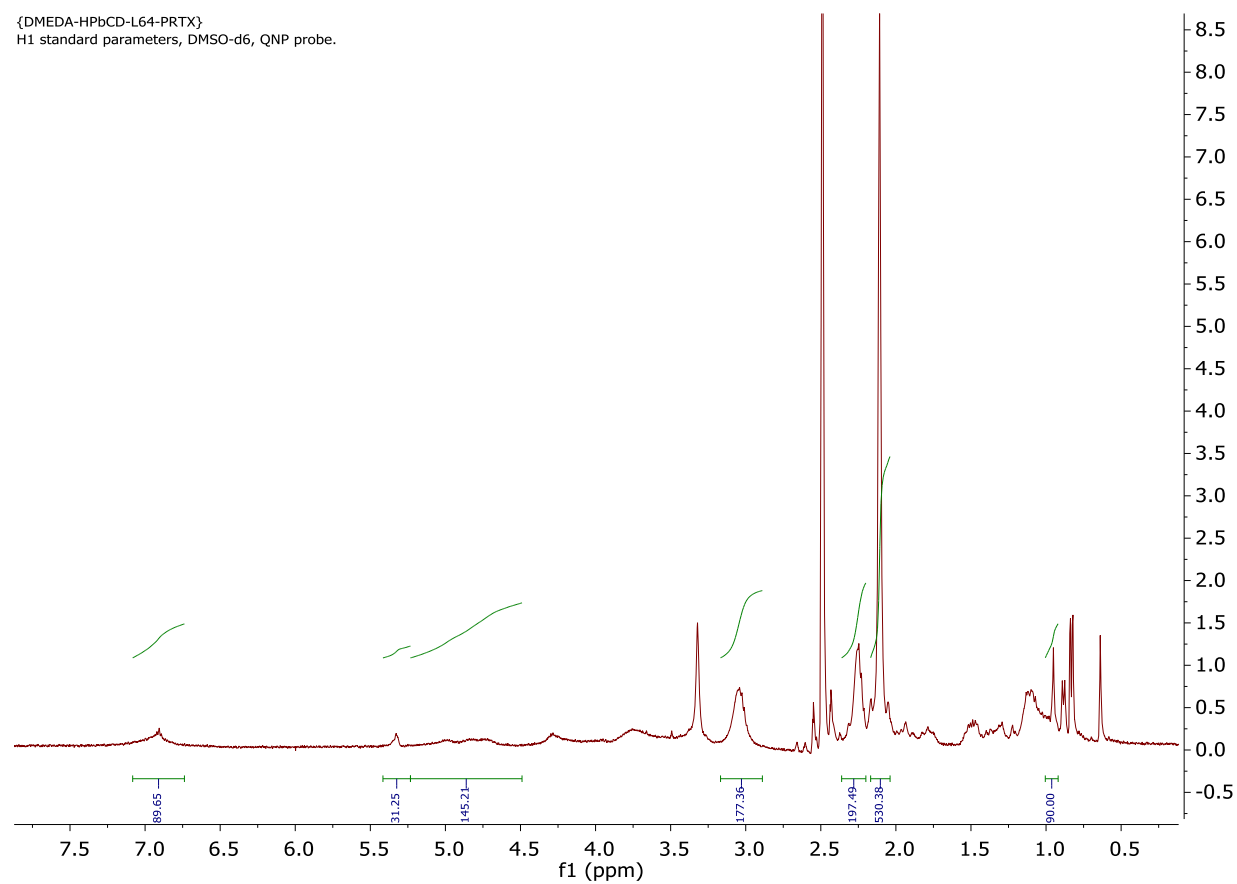

**Figure S9:**  $^1\text{H}$  NMR Spectrum of DMEDA-HPCD:L64 Pluronic PR

# <sup>1</sup>H NMR Spectrum of DMEDA-HPCD:L81 Pluronic PR

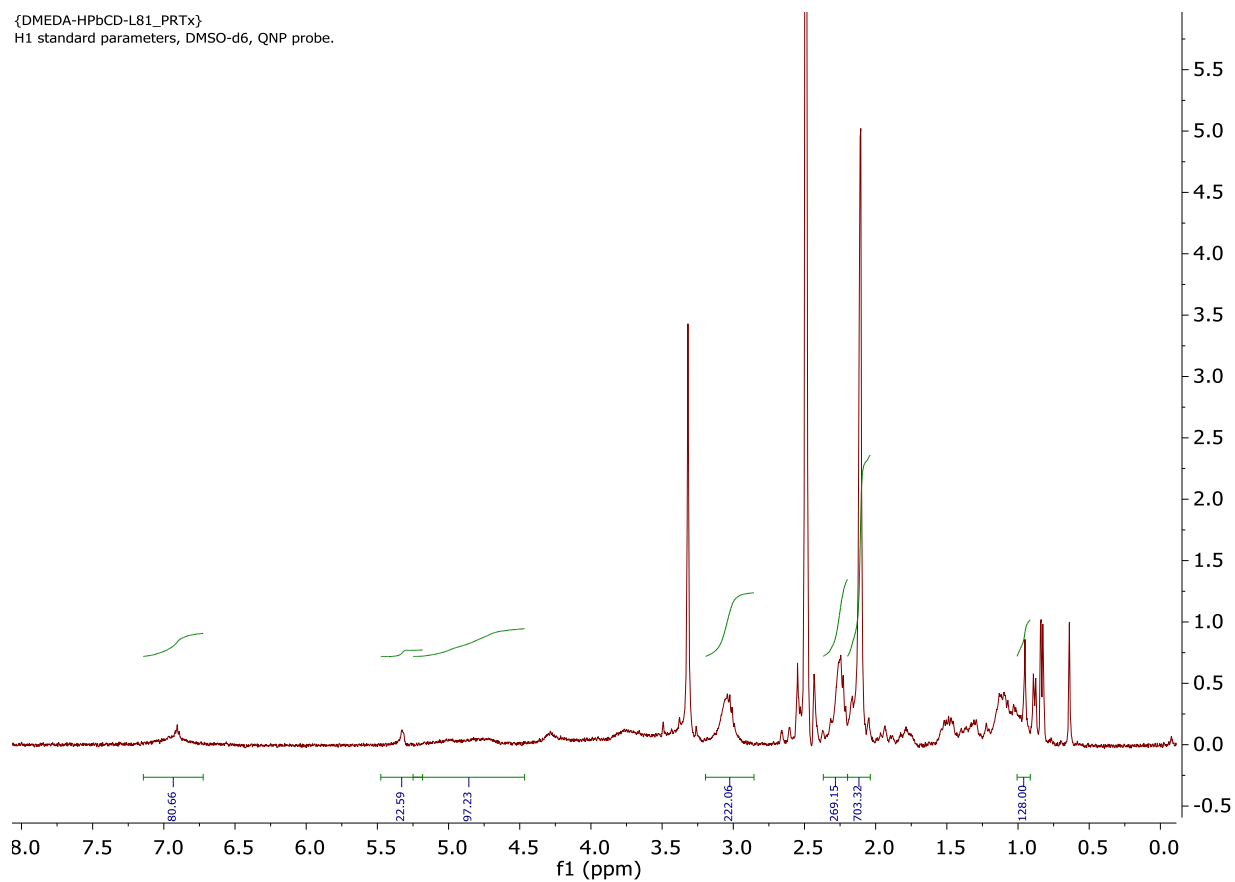

**Figure S10:** <sup>1</sup>H NMR Spectrum of DMEDA-HPCD:L81 Pluronic PR<sup>+</sup>

## 2. AFM images of PR<sup>+</sup>:pDNA complexes

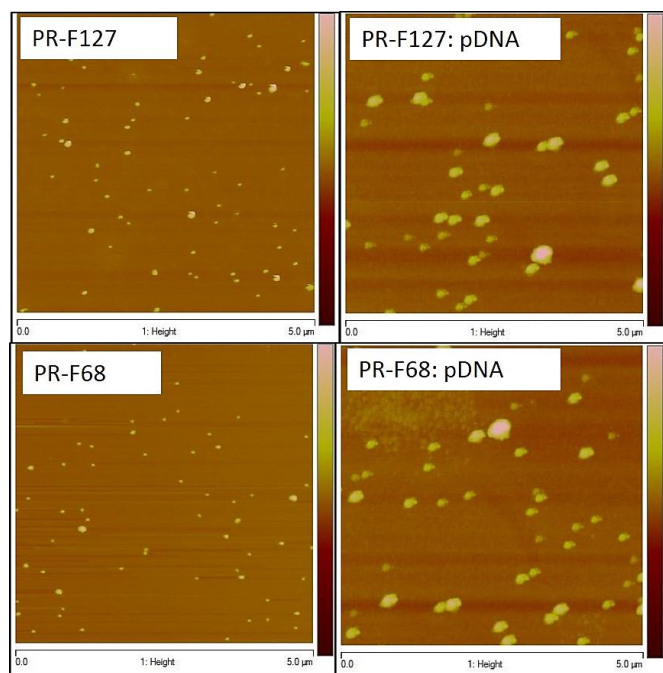

**Figure S11:** AFM images of PR<sup>+</sup> and PR<sup>+</sup>:pDNA complexes at N/P ratio of 30.

### 3. Gel shift assay of PR<sup>+</sup>:pDNA complexes

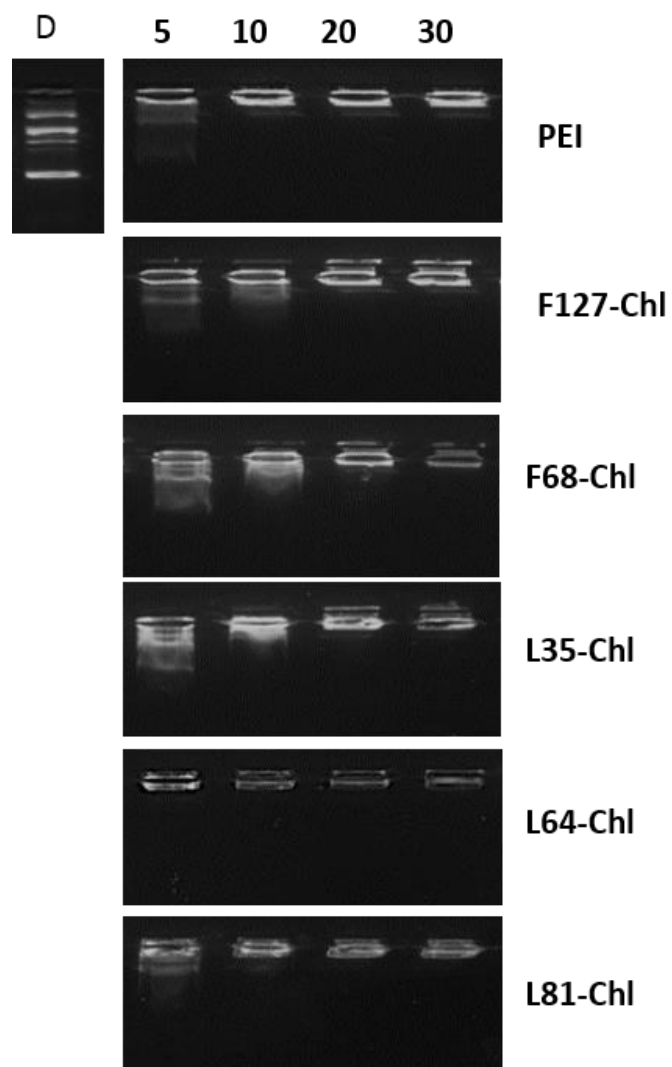

**Figure S12.** Gel retardation assay showing complexation ability of bPEI, F127-, F68-, L35-, L64- and L81-based PR<sup>+</sup> complexes formed at different N/P ratios.

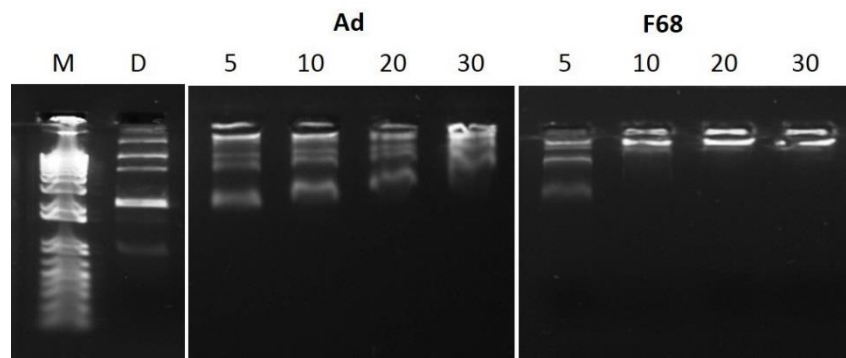

**Figure S13.** Gel retardation assay showing comparison between complexation ability of Admantane-PVA-PEG pendant polymer system with that of F68-based PR<sup>+</sup> at different N/P ratios.

#### 4. *PicoGreen assay of PR<sup>+</sup>:pDNA complexes*

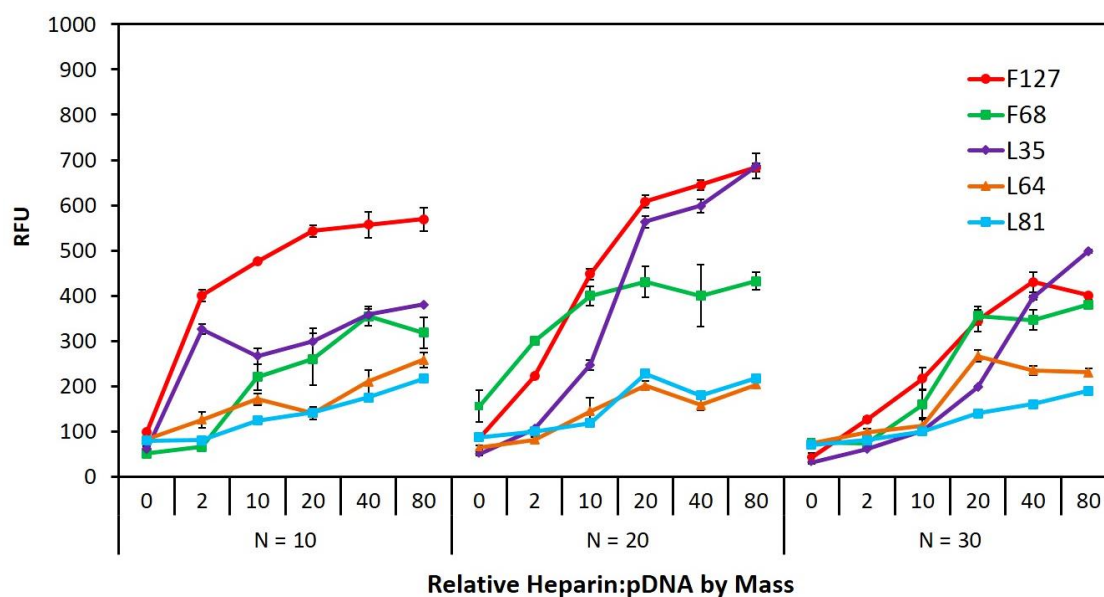

**Figure S14.** PicoGreen competitive binding assay showing colloidal stability of F68-, L35-, L64- and L81- based PR<sup>+</sup>:pDNA complexes formulated at different N/P ratios. All the complexes were assayed for pDNA binding affinity at increasing heparin concentration from 0 to 80 weight ratio relative to pDNA.

5. *Raw flow-cytometry data for cellular uptake, transfection and cell viability using SYTOX*

*AADvanced dead stain (red)*

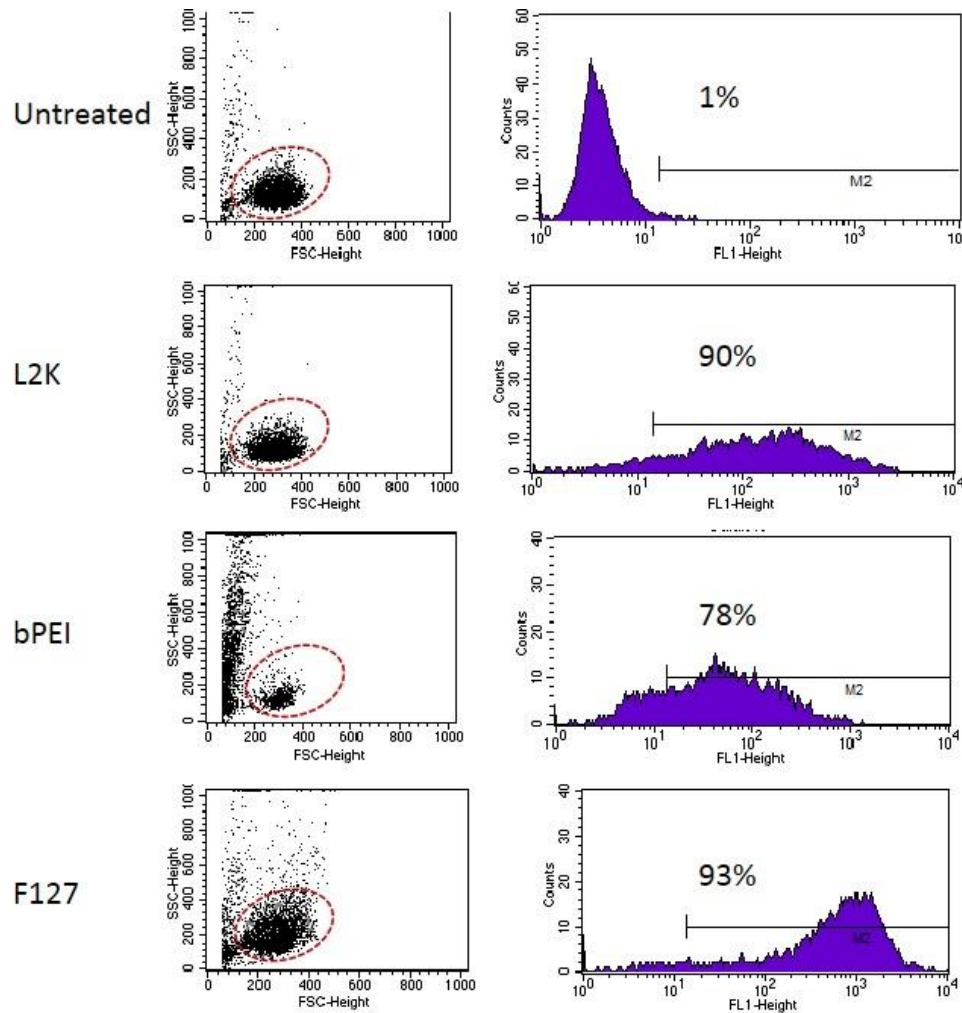

**Figure S15.** Representative FACS dot and histogram plots of cellular uptake of untreated, L2K, bPEI, and F127-based PR<sup>+</sup> complexes in NIH 3T3 cells. bPEI, and F127-based PR<sup>+</sup>:pDNA complexes were formulated at N/P = 30 before addition to HeLa cells. Complexes of 1µg FITC-labeled pDNA were incubated with the cells in 10% serum-supplemented media for 4 h and analyzed. A total population of 10,000 cells were analyzed in each case as described in Experimental Methods.

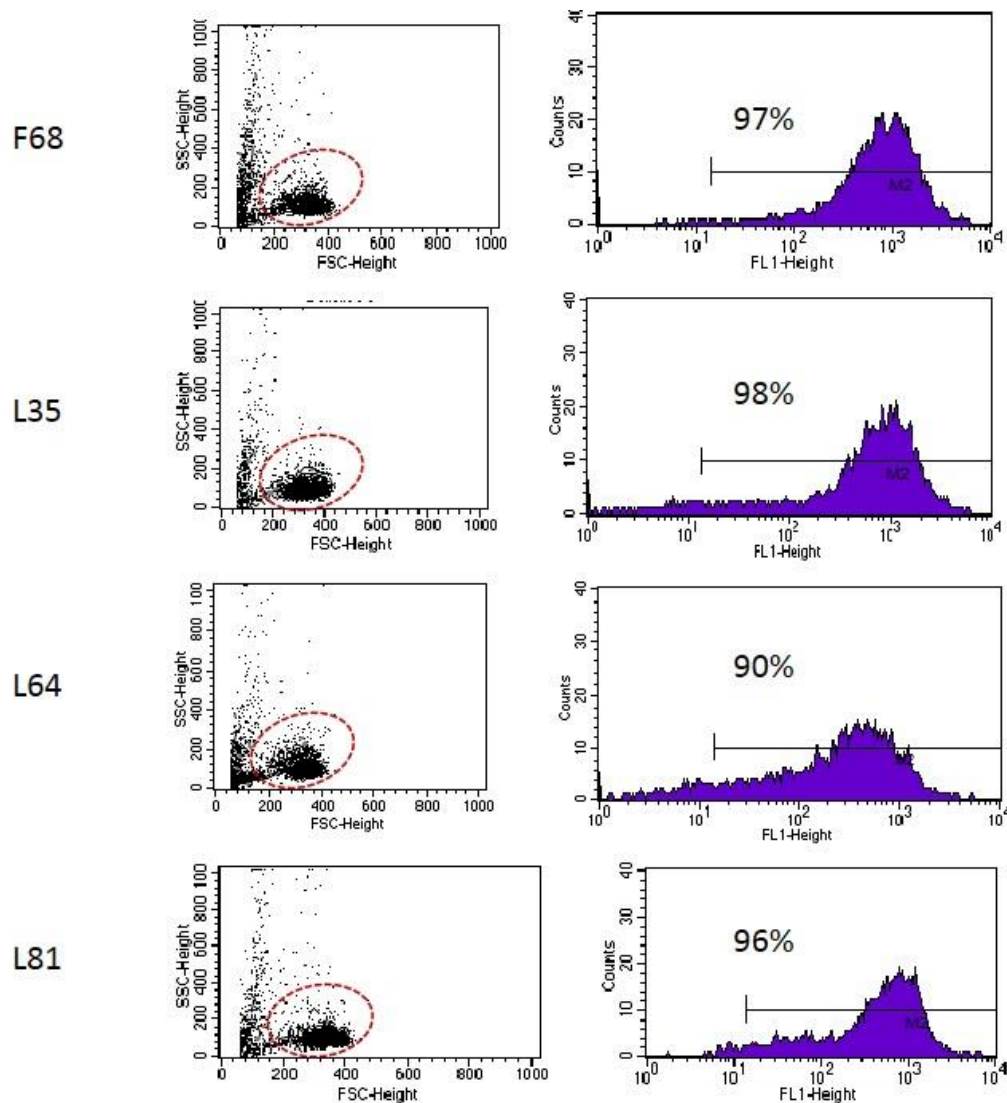

**Figure S16.** Representative FACS dot and histogram plots of cellular uptake of F68-, L35-, L64- and L81- based PR<sup>+</sup>pDNA complexes formulated at N/P = 30 prior to treatment of NIH 3T3 cells. Complexes containing 1 $\mu$ g FITC-labeled pDNA were incubated with the cells in 10% serum-supplemented media for 4 h and analyzed in each case as described in Experimental Methods.

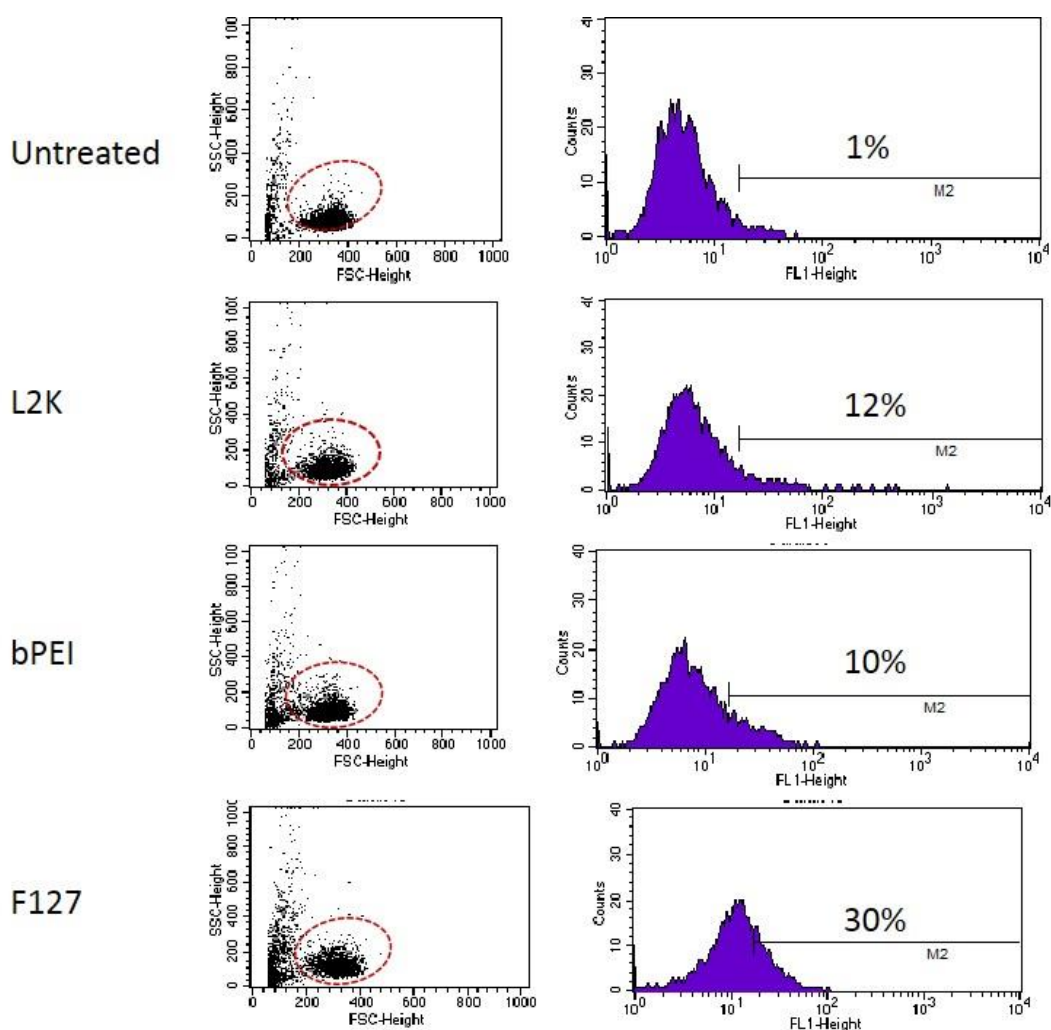

**Figure S17.** Representative FACS dot and histogram plots of untreated and pDNA transfected NIH 3T3 cells using L2K, bPEI, and F127-based PR<sup>+</sup>. bPEI and F127-based PR<sup>+</sup> complexes were formulated at N/P = 30. Complexes of 1 $\mu$ g pDNA were incubated with the cells in 10% serum-supplemented media for 4 h and analyzed after a further 36 h incubation as described in Experimental Methods.

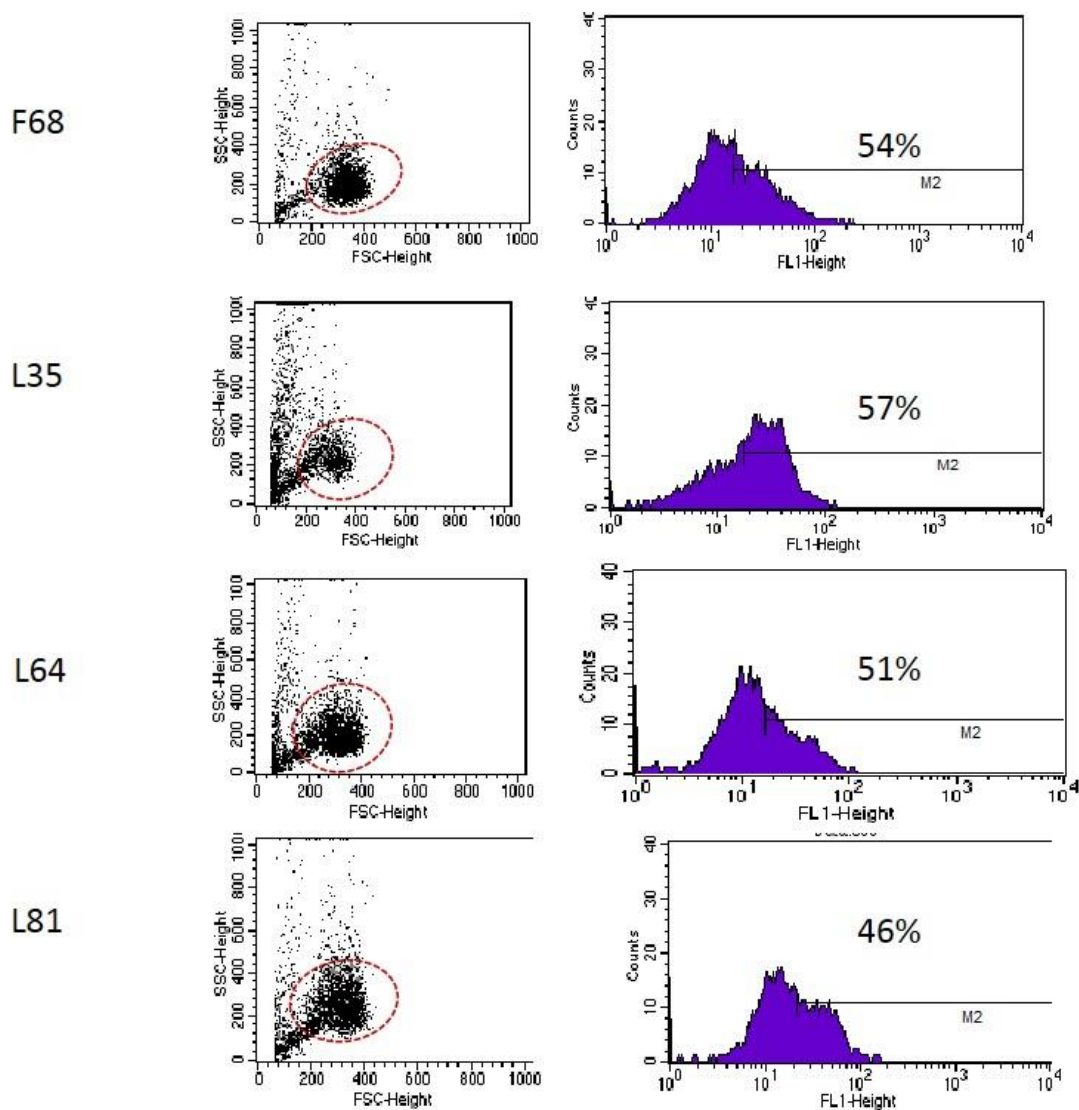

**Figure S18.** Representative FACS dot and histogram plots of pDNA transfection by F68-, L35-, L64- and L81-based PR<sup>+</sup>:pDNA complexes formulated at N/P = 30 in NIH 3T3 cells. Complexes of 1  $\mu$ g FITC-labeled pDNA were incubated with the cells in 10% serum-supplemented media for 4h and analyzed after a further 36 h incubation as described in Experimental Methods.

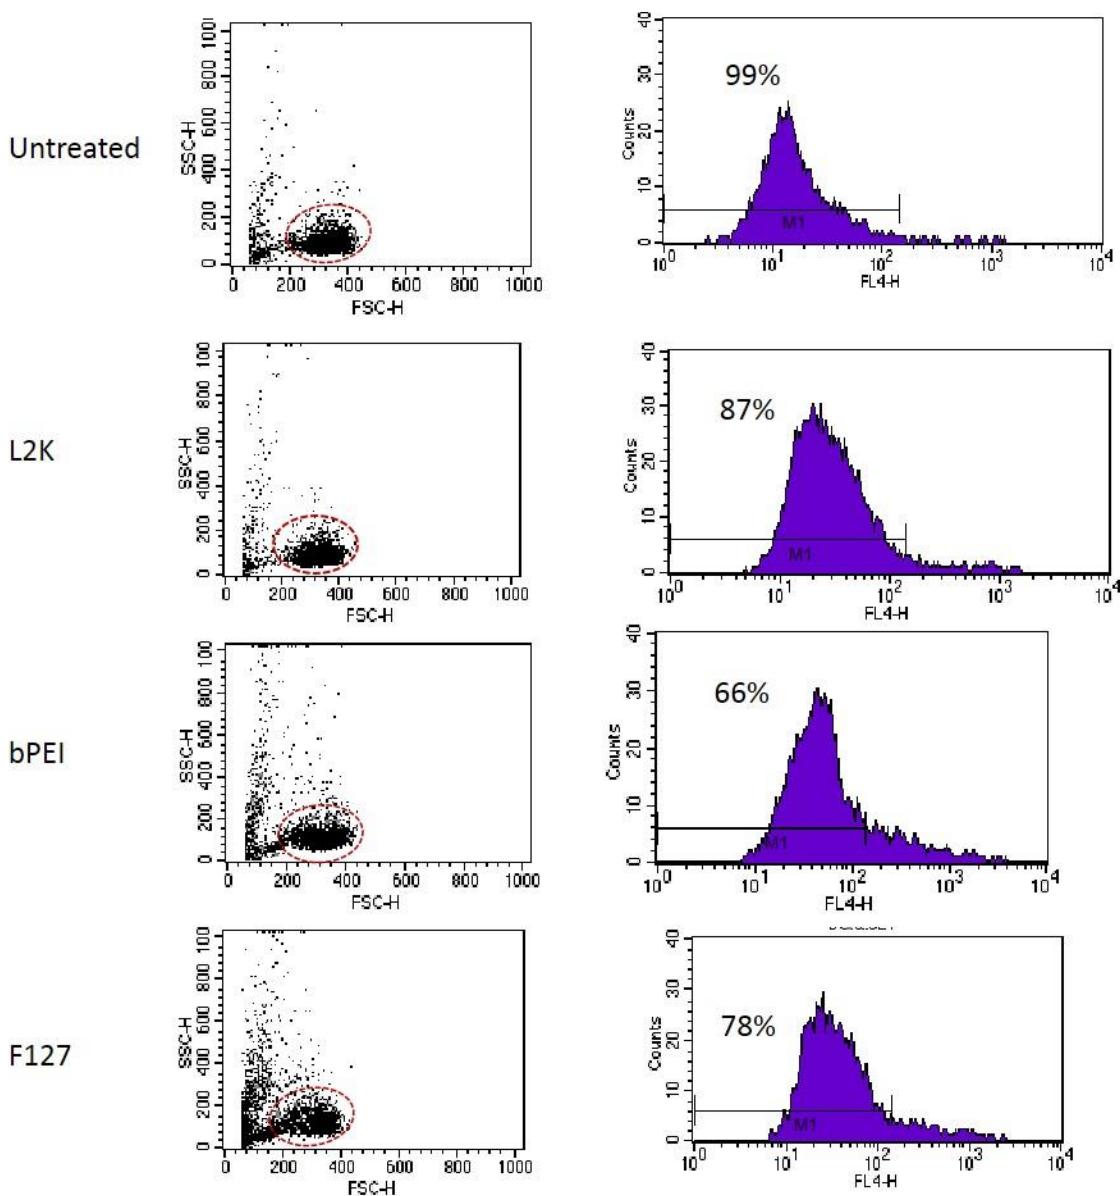

**Figure S19.** Representative FACS dot and histogram plots of SYTOX AADvanced labeling of NIH 3T3 cells treated with L2K, bPEI, and F127-based PR<sup>+</sup>:pDNA complexes. bPEI and F127-based PR<sup>+</sup> complexes were formulated at N/P = 30. Complexes of 1  $\mu$ g AcGFP1 pDNA were incubated with the cells in 10% serum-supplemented media for 4 h and analyzed after a further 36 h incubation as described in Experimental Methods.

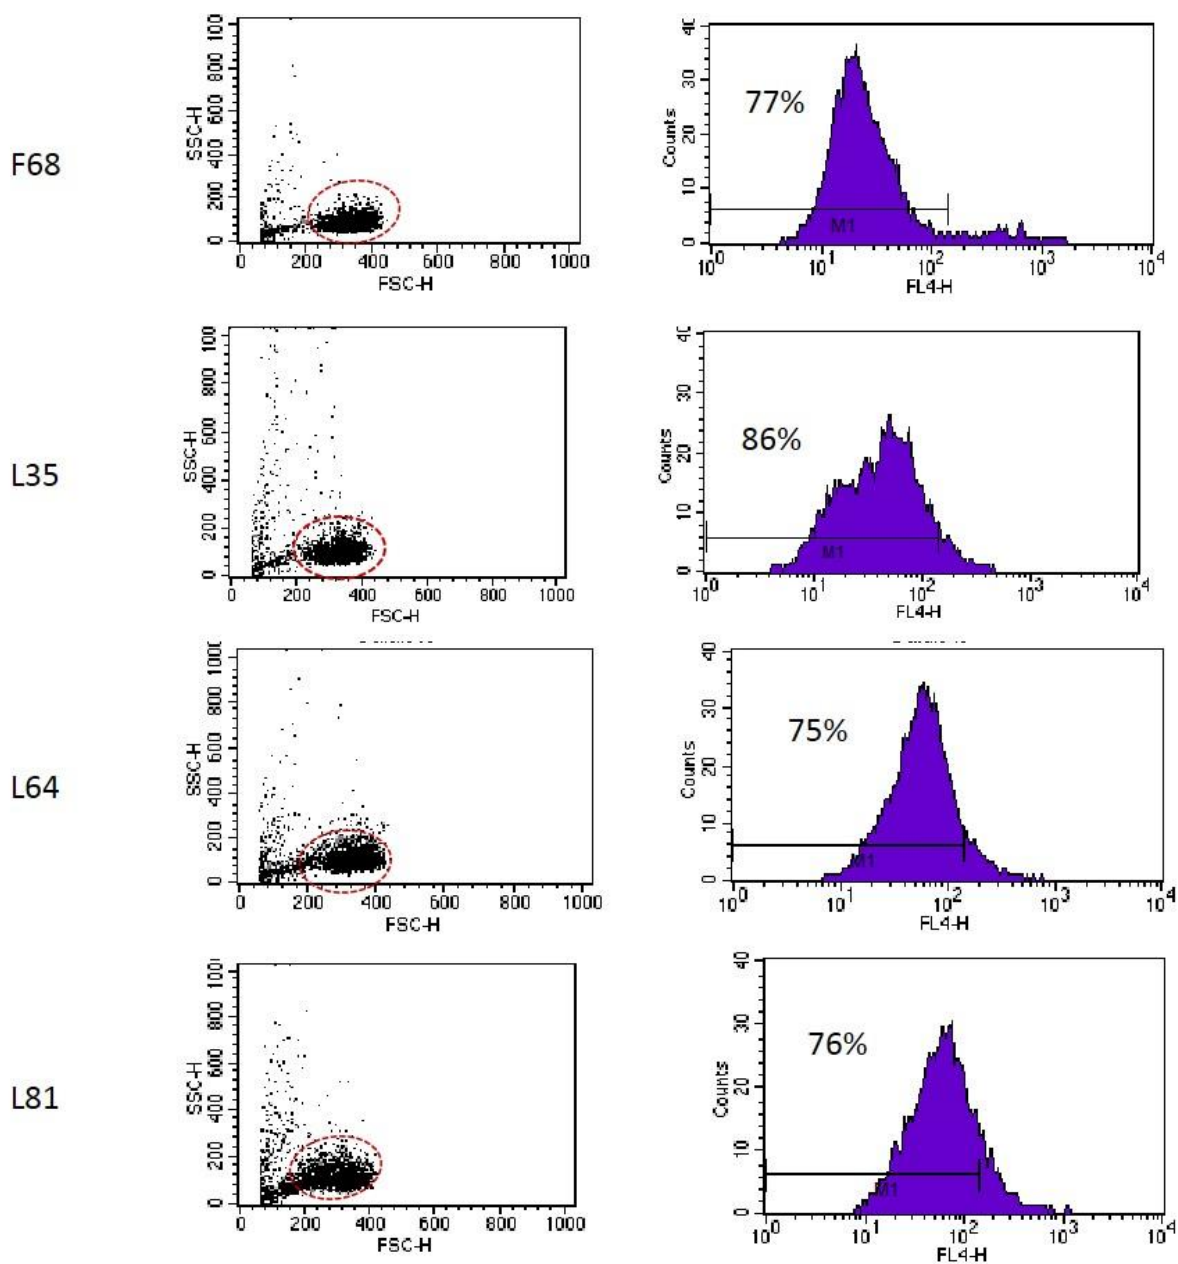

**Figure S20.** Representative FACS dot and histogram plots of SYTOX AADvanced dead stain (red) labeling of NIH 3T3 cells treated with F68-, L35-, L64- and L81-based PR<sup>+</sup> pDNA complexes formulated at N/P = 30. Complexes of 1 µg pDNA were incubated with the cells in 10% serum-supplemented media for 4 h and analyzed after a further 36 h incubation as described in Experimental Methods.
